# Supplementary material
Source: publisher site journal article supplement (https://www.dovepress.com/article/492321)
Supplement: Supplementary file 1 [file get_supplementary_file.php]

Appendix 1: On-line survey associated with the study

You are invited to participate in a brief, anonymous survey that aims to assess your satisfaction with the current laparoscopic surgical training in your residency program. Your honest feedback is crucial as it may be used to guide improvements to the training curriculum. The survey should take approximately 5 minutes to complete, and your responses will be kept strictly confidential. Thank you for your time and cooperation in helping us enhance the quality of surgical education.

1. Age
2. Gender:
   - Male
   - Female
3. Marital Status
   - Single
   - Married
   - Separated/Widowed
4. Which is your current level of residency?
   - PGY 1
   - PGY 2
   - PGY 3
   - PGY 4
   - PGY 5
5. In which hospital(s) did you conduct most of your training? (the place where you spent most of the training period):
6. Over the past year of training, how many laparoscopic operations – on average – have you had the chance to assist in or perform? (approximately)
   - Less than one operation a month (less than 12 / year)
   - About 1-4 laparoscopic operations a month (12-48 / year)
   - About 5-9 laparoscopic operations a month (49 – 108 / year)
   - About 10-15 laparoscopic operations a month (109 – 180 / year)
   - More than 15 laparoscopic operations a month (more than 180 / year)

**For the following questions, please choose the number that represents your best answer where 1 reflects very unsatisfied, and 5 reflects that you are very satisfied.**

1. What is your level of satisfaction with each of the following aspects of your training thus far? (note, 1 is very unsatisfied, and 5 is very satisfied)
   - Teaching of laparoscopic skills concepts and fundamentals
   - The clinical case volume of laparoscopic cases
   - The intraoperative laparoscopic hands-on participation
   - Overall satisfaction with laparoscopic surgery training in the program
2. How would you self-assess your satisfaction with your own laparoscopic skills in each of the following tasks? (note, 1 is very unsatisfied, and 5 is very satisfied)
   - Depth perception
   - Accuracy of hand-to-hand coordination
   - Accuracy in cutting with laparoscopic scissors
   - Accuracy in grasping and manipulating tissue
   - Proficiency in using the Endo-loop
   - Performing extracorporeal knotting (making a surgical knot outside the laparoscopic operative filed then sliding it into the field)
   - Performing intracorporeal knotting (making a surgical knot within the laparoscopic operative field)
3. For the following laparoscopic operations, please rate how comfortable you are with performing each of them? (note, 1=very unsatisfied “i.e. not comfortable at all in doing significant part of operation”, 3= neutral “i.e. can perform some parts of the operation only with senior assistance”, 5= very satisfied “i.e. can perform straightforward cases independent of senior assistance”)
   - Laparoscopic cholecystectomy
   - Laparoscopic appendectomy
   - Laparoscopic repair of inguinal hernia (transabdominal "TAPP")
   - Laparoscopic repair of inguinal hernia (totally extraperitoneal "TEP")
   - Laparoscopic ventral hernia repair with mesh
   - Laparoscopic partial colectomy (i.e. hemicolectomy)
   - laparoscopic partial gastrectomy (i.e. sleeve gastrectomy)
   - Laparoscopic abdominal exploration (diagnostic)
4. How do you train / prepare for laparoscopic surgeries? [can choose more than one]
   - Reading operative books
   - Watching laparoscopic videos
   - Simulation-based practice
   - Train inside the operating rooms
   - Attend laparoscopic surgeries (to watch)
5. Have you been exposed and / or trained with laparoscopic trainers, such as the ones used in Fundamentals of Laparoscopic Surgery (FLS) before?
   - Never exposed to laparoscopic trainers
   - Exposed to laparoscopic trainers but never practiced
   - Practiced but did not obtain laparoscopic training certification
   - Practiced and obtained laparoscopic training certification
     - Please write the name of the course or certificate
